1 **Systematic recovery of building plumbing-associated microbial communities after extended periods of**  
2 **altered water demand during the COVID-19 pandemic.**

3

4 Solize Vosloo<sup>1</sup>, Linxuan Huo<sup>2</sup>, Umang Chauhan<sup>1</sup>, Irmarié Cotto<sup>1</sup>, Benjamin Gincley<sup>1</sup>, Katherine J  
5 Vilardi<sup>1</sup>, Byungman Yoon<sup>1</sup>, Kelsey J Pieper<sup>1</sup>, Aron Stubbins<sup>1</sup>, and Ameet Pinto<sup>2\*</sup>

6

7 <sup>1</sup>Department of Civil and Environmental Engineering, Northeastern University, Boston,  
8 Massachusetts, USA

9 <sup>2</sup>School of Civil and Environmental Engineering, Georgia Institute of Technology, Atlanta, USA

10

11 \*Corresponding author: Ameet Pinto ([ameet.pinto@ce.gatech.edu](mailto:ameet.pinto@ce.gatech.edu))

12

13 **Key words:** Premise plumbing, stagnation, water quality, COVID-19 pandemic, flow cytometry

14 **Abstract**

15 Building closures related to the coronavirus disease (COVID-19) pandemic resulted in increased  
16 water stagnation in commercial building plumbing systems that heightened concerns related to the  
17 microbiological safety of drinking water post re-opening. The exact impact of extended periods of  
18 reduced water demand on water quality is currently unknown due to the unprecedented nature of  
19 widespread building closures. We analyzed 420 tap water samples over a period of six months,  
20 starting the month of phased reopening (i.e., June 2020), from sites at three commercial buildings  
21 that were subjected to reduced capacity due to COVID-19 social distancing policies and four  
22 occupied residential households. Direct and derived flow cytometric measures along with water  
23 chemistry characterization were used to evaluate changes in plumbing-associated microbial  
24 communities with extended periods of altered water demand. Our results indicate that prolonged  
25 building closures impacted microbial communities in commercial buildings as indicated by  
26 increases in microbial cell counts, encompassing greater proportion cells with high nucleic acids.  
27 While flushing reduced cell counts and increased disinfection residuals, the microbial community  
28 composition in commercial buildings were still distinct from those at residential households.  
29 Nonetheless, increased water demand post-reopening enhanced systematic recovery over a period  
30 of months, as microbial community fingerprints in commercial buildings converged with those in  
31 residential households. Overall, our findings suggest that sustained and gradual increases in water  
32 demand may play a more important role in the recovery of building plumbing-associated microbial  
33 communities as compared to short-term flushing, after extended periods of altered water demand  
34 that result in reduced flow volumes.

35

## 36 Introduction

37 Social distancing policies enacted in March 2020 during the initial wave of the coronavirus  
38 (COVID-19) pandemic to combat disease spread<sup>1,2</sup> caused widespread building closures in the  
39 non-residential sector (i.e., commercial, industrial, etc.). These measures limited building  
40 occupancy and adjusted individual and societal behaviors (e.g., homebased remote learning and  
41 working practices, hygiene practices)<sup>3</sup>, which significantly altered water demand at the water  
42 distribution and building system levels<sup>4-10</sup>. The impact of policy interventions related to the  
43 COVID-19 pandemic on water demand have recently been addressed<sup>4-10</sup>. Several studies have  
44 reported significant reductions in water demand across non-residential sector buildings<sup>5,8-10</sup>. For  
45 example, Li et al. (2020) reported a decrease of 11.6% in water demand across non-residential  
46 sectors in California (United States), while Kalbusch et al. (2020) documented reductions in water  
47 demand, ranging between 30% and 53%, across non-residential sectors in Joinville, Brazil.  
48 Contrasting, reports in residential sectors (houses, apartments, and condominiums) indicate  
49 increases in water demand<sup>6-9</sup>, as well as anomalies in water demand peaks<sup>7,10</sup>.

50  
51 Reduced water demand resulting in lower flow volumes and higher stagnation times in the building  
52 plumbing have been linked to water quality deterioration and several issues that are of public health  
53 concern, including microbial regrowth<sup>11-14</sup>, opportunistic plumbing pathogen (OPP) growth<sup>12,15-  
54 17</sup>, metal (e.g., lead) leaching<sup>18</sup>, and disinfectant byproduct formation (trihalomethanes (THMs),  
55 haloacetic acids (HAAs))<sup>19</sup>. Unlike drinking water distribution systems, building plumbing  
56 systems experience significant loss in disinfectant residual, have large temperature gradients and,  
57 consist of unique site-specific features (e.g., heterogenous materials, high surface area to volume  
58 ratios, onsite storage tanks) that impact water quality and promote microbial and OPP growth  
59 during periods of low water demand<sup>14,17,20</sup>. In contrast to drinking water distribution systems that  
60 are subject to water monitoring plans, building plumbing systems rely on guidance documents,  
61 consisting of remediation actions, to ensure safe water quality at point of use (PoU)<sup>21</sup>. Remedial  
62 actions recently incorporated in guidance documents to minimize risks associated with water  
63 quality deterioration in buildings impacted by COVID-19 social distancing policies, include  
64 continuous or shock disinfection, routine flushing, and diagnostic testing of OPPs (*Legionella*  
65 spp.)<sup>21,22</sup>. The scope and details of these remedial actions varies widely and depend on site-specific  
66 factors, i.e., building size and plumbing configuration, as well as the risk(s) that needs to be

67 mitigated. Flushing replenishes disinfectant residual concentrations as well as reduces microbial  
68 and OPP loads in building plumbing systems<sup>11,14,16,17</sup>. The effectiveness of flushing practices in  
69 restoring water quality to baseline conditions are typically assessed by performing intermittent  
70 testing of temperature and disinfectant residual concentrations<sup>21</sup>. Stabilization of these measures  
71 during flushing are indicative of baseline water quality conditions<sup>13</sup>; however, neither of these  
72 measures provide direct microbiological insight. Flow cytometry has been an established  
73 technology for high-resolution monitoring of microbial communities in water system<sup>23</sup> as it  
74 provides direct quantitative measures of cell concentrations as well shifts in microbial community  
75 fingerprints<sup>24–27</sup>. For example, it has been used to monitor pipe flushing after overnight stagnation  
76 in buildings<sup>11,13</sup> and during maintenance operations in the drinking water distribution systems<sup>28</sup>.

77  
78 Managing water quality in buildings is crucial to avoid plumbing-associated health risks; however,  
79 consensus in guidance documents and expert opinions on design and operational topics that are  
80 critical for water quality management are lacking<sup>21,22</sup>. Data generated from field studies can drive  
81 the development of evidence-based best practices for water quality management, which can  
82 facilitate more informed and coherent decisions. This study examines the dynamics of plumbing-  
83 associated microbial communities in response to altered water demand during the COVID-19  
84 pandemic in Boston, Massachusetts. Drinking water samples were collected monthly over a period  
85 of six months, starting the month of phased reopening, i.e., June 2020, from commercial buildings  
86 and residential households and characterized using flow cytometry as well as a comprehensive  
87 suite of water chemistry parameters. Our objectives were (1) to evaluate the impact of extended  
88 periods of altered water demand on microbial communities, (2) to assess the impact of flushing on  
89 drinking water microbial communities, and (3) to determine the impact of phased reopening on  
90 the drinking water microbial communities in residential and commercial building plumbing.

## 91 **Materials and Methods**

### 92 **Description of study site and sample collection**

93 Shortly after a state of emergency was declared in Massachusetts (MA) (March 10, 2020), college  
94 campuses across MA transitioned to remote learning. As a result, classrooms, residence halls, and  
95 assembly buildings (e.g., dining services) were closed and non-essential research operations were  
96 halted on multiple campuses including Northeastern University (NEU) in Boston. On June 1<sup>st</sup>,



97 NEU partially reopened for research activities at established laboratory capacity limits of 25% for  
98 the remainder of the year. For the Fall 2020 semester, residence halls and classrooms opened at  
99 reduced capacity and NEU operated with hybrid learning, which encompassed part in-person and  
100 part remote learning. In this study, three NEU buildings (hereafter, commercial buildings) and  
101 four residential households were monitored to evaluate the impact of varying water demand on  
102 building plumbing-associated microbial communities. These site types (commercial buildings and  
103 residential households) (i) ranged in size, age, and functionality, (ii) were situated within five miles  
104 of each other and (iii) were served with chloraminated water from the same distribution system.  
105 Cold water taps at each site type, i.e., commercial building (number of sites =3, number of taps  
106 per site = 2) and residential households (number of sites = 4, number of taps per site = 1), were  
107 selected for monthly sampling over six months. These taps included taps from residential kitchens  
108 ( $n = 2$ ), commercial kitchenets ( $n = 3$ ), residential bathrooms ( $n = 2$ ), and research laboratories in  
109 commercial buildings ( $n = 3$ ). Flushing profiles were conducted at all ten taps monthly on two  
110 consecutive days. Seven samples were obtained from each tap including the first draw sample  
111 (time point 1 (TP<sub>1</sub>, 0 min)) and six flushed samples that were collected at five min intervals over  
112 a period of 30 min (TP<sub>2</sub>, 5 min; TP<sub>3</sub>, 10 min; TP<sub>4</sub>, 15 min, TP<sub>5</sub>, 20 min, TP<sub>6</sub>, 25 min, and TP<sub>7</sub>, 30  
113 min). Samples collected at TP<sub>1</sub> and TP<sub>7</sub> included a 2,000 mL sample in 2 L narrow-mouth  
114 polycarbonate bottles (Thermo Scientific™, Cat. No.: DS22050210) as well as a 500 mL sample  
115 in 500 mL wide-mouth HDPE bottles (Thermo Scientific™, Cat. No.: 02-896-2E). The latter  
116 sample were included for metal analysis, while aliquots (50 mL sample) of the 2,000 mL sample  
117 were used for measures of water chemistry. Post-first flush samples (i.e., TP<sub>2</sub> – TP<sub>6</sub>) were collected  
118 in sterile 15 ml polyethylene centrifuge tubes (Falcon™, Cat No.: 352196). Intermittent  
119 temperature measurements were obtained throughout the duration of sampling at 10 sec intervals  
120 using an Elitech GSP-6 data logger and flow rates averaged at  $4.10 \pm 1.80 \text{ L}\cdot\text{min}^{-1}$ , ranging between  
121 2.00 and  $8.19 \text{ L}\cdot\text{min}^{-1}$  (Table S1).

122

### 123 **Water chemistry analysis**

124 Water quality parameters (i.e., temperature, pH, conductivity, and dissolved oxygen) were  
125 measured using the Orion Star™ A325 pH/Conductivity Portable Multiparameter Meter (Thermo  
126 Scientific™, Cat. No.: STARA3250). Total chlorine was measured using HACH Method 8167  
127 with DPD Total Chlorine Reagent Powder Pillows (HACH, Cat. No.: 2105669). Nitrogen species,

128 including ammonium, nitrate, and nitrite were measured using the Nitrogen-Ammonia Reagent  
129 Set (Method 10023, HACH, Cat. No.: 2604545), NitraVer X Nitrogen-Nitrate Reagent Set  
130 (Method 10020 HACH, Cat. No.: 2605345), and NitriVer 3 TNT Reagent Set (Method 10019, Cat.  
131 No.: 2608345), respectively. All HACH measurements were performed on the DR1900 Portable  
132 Spectrophotometer (HACH, Cat. No.: DR190001H). For metal analysis, samples were acidified  
133 with 2% nitric acid and digested from a minimum of 16 hours before analysis on the Inductively  
134 Coupled Plasma – Mass Spectrometry (ICP-MS) according to method 3125 B<sup>29</sup>. Blanks and spikes  
135 of known concentrations were measured every 10 samples for all analyses for quality  
136 control. Samples for dissolved organic carbon (DOC) and total dissolved nitrogen (TDN) were  
137 acidified to pH < 2 using HCl (p.a.) before analysis using a Shimadzu TOC-V<sub>CPH</sub> total organic  
138 carbon analyzer with a Total Nitrogen Module (TNM) attached<sup>30</sup>. Certified DOC and TDN quality  
139 references from Ultra Scientific (QCI-731 and QCI-745Agilent) were measured to confirm  
140 precision and accuracy. Measured DSR values were consistent with the consensus values with a  
141 standard deviation <5%. Routine minimum DOC detection limits using the above configuration  
142 are  $0.034 \pm 0.004$  mg L<sup>-1</sup> and standard errors are typically  $1.7 \pm 0.5$  % of the DOC concentration<sup>30</sup>.  
143 For TDN, routine minimum detection limits are  $0.041 \pm 0.003$  mg L<sup>-1</sup> and standard errors are  
144 typically  $0.8 \pm 0.4$  % of the TDN concentration<sup>30</sup>.

145

#### 146 **Flow cytometry analysis**

147 Samples were processed in triplicate to obtain flow cytometric (FCM) measurements of total cell  
148 concentrations (TCC) and intact cell concentrations (ICC) as described previously<sup>31–33</sup>. Briefly,  
149 samples (500 µl) treated with 10mM sodium thiosulfate (1% (v/v)) (Alfa Aesar™, Cat. No.:  
150 AA35645K2) were pre-heated at 37°C for 3 min and then stained with SYBR Green I (SG)  
151 (Invitrogen™, Cat. No.: S7585) (1:100 SG diluted in 10 mM Tris-HCl (pH 8.5, Bioworld, Cat.  
152 No: NC1213695) at 10 µL.ml<sup>-1</sup> (TCC measurements) or SG combined with propidium iodide (PI)  
153 (Molecular Probes™, Cat. No.: P3566) (3 µM final concentration) at 12 µL.ml<sup>-1</sup> (ICC  
154 measurements). After staining the samples were incubated in the dark at 37°C for 10 min using  
155 the Eppendorf ThermoMixer® 2C (Eppendorf, Cat. No.: 2231000680). Five negative controls  
156 were processed identically and in parallel with the samples, including (i) unstained UltraPure™  
157 DNase/RNase-Free Distilled Water (Thermo Fisher Scientific, Cat. No.: 10977015), (ii) SG  
158 stained UltraPure™ DNase/RNase-Free Distilled Water, (iii) SGPI stained UltraPure™

159 DNase/RNase-Free Distilled Water, (iv) SG stained 0.22 $\mu$ m filtered drinking water sample, and  
160 SGPI stained 0.22 $\mu$ m filtered drinking water sample. FCM analysis was performed on 50  $\mu$ L  
161 sample at a pre-set flow rate of 66  $\mu$ L $\cdot$ min<sup>-1</sup> using a BD Accuri® C6 flow cytometer (BD Accuri®  
162 cytometers, Belgium), which is equipped with a 50mW solid state laser emitting light at a fixed  
163 wavelength of 488 nm. Green and red fluorescent intensity were collected at FL1 = 533  $\pm$  30 nm  
164 and FL3 > 670 nm, respectively, along with sideward (SSC) and forward (FCS) scatter light  
165 intensities. Flow Cytometry Standard (FCS) files were processed in R v4.1.2<sup>34</sup> using the  
166 Phenoflow package v1.1<sup>24</sup> and its dependencies ([https://github.com/CMET-](https://github.com/CMET-UGent/Phenoflow_package)  
167 [UGent/Phenoflow\\_package](https://github.com/CMET-UGent/Phenoflow_package)). Briefly, FCS files were imported into R using flowCore v2.2.0<sup>35</sup> and  
168 then four parameters in signal height format (i.e., FL1-H, FL3-H, SSC-H, and FSC-H) were  
169 extracted and rescaled using hyperbolic arcsine transformations. A fixed polygonal gate was  
170 applied on the FL1-H and FL3-H graph to separate signal (i.e., cells) and background noise (i.e.,  
171 instrument noise and (in)organic background)<sup>36,37</sup> and to estimate measures of ICC and TCC as  
172 cells. $\mu$ L<sup>-1</sup>. A threshold on FL1-H was selected to estimate high - and low nucleic acid cell  
173 concentrations in cells. $\mu$ L<sup>-1</sup> (HNA and LNA, respectively). The function flowBasis were used for  
174 advance fingerprinting, with nbin set to 128 and bw (band width) set to 0.01<sup>24</sup>. From this,  
175 biodiversity estimates, i.e., phenotypic diversity index (D<sub>2</sub>; arbitrary units, a.u.) and evenness  
176 (a.u.), were calculated as well as measures of beta diversity through Bray-Curtis dissimilarity  
177 using, in addition, the vegan package<sup>38</sup>. All biodiversity measures were performed after resampling  
178 to the sample with the lowest cell count. The raw FCS files have been deposited in FlowRepository  
179 and are publicly available under accession number FR-FCM-Z4SR.

180

## 181 **Statistical analysis**

182 Statistical analysis was performed using packages in R v4.1.2<sup>34</sup>. Water quality parameters, i.e.,  
183 water chemistry measures and flow cytometric measurements, were assessed for normality using  
184 the Shapiro-Wilks test provided in the stats package<sup>34</sup> and then comparisons between groups were  
185 done by performing either independent t-test (t.test{stats}; parametric test for independent  
186 samples) or Mann-Whitney U test (wilcox.test{stats}; non-parametric test for independent  
187 samples). Non-multidimensional scaling (NMDS) was performed using metaMDS provided in the  
188 vegan package<sup>38</sup> to visualize differences in beta diversity based on Bray-Curtis dissimilarity  
189 distances and permutational multivariate analysis of variance (PERMANOVA) was performed

190 using `adonis{vegan}`. To identified localized factors driving change in the microbial community  
191 composition, water chemistry data were z-score standardized and considered for Bray-Curtis  
192 distance-based redundancy analysis (dbRDA) using `dbrda{vegan}`. To circumvent for bias  
193 associated with collinearity, colinear variables with significant Pearson correlation coefficient  $>$   
194  $0.70$  and  $< -0.70$  were identified and then placed into clusters followed by the selection of one  
195 variable per cluster for dbRDA<sup>39</sup>. The excluded colinear variables were considered for discussion  
196 and placed in brackets, with “+” denoting positive correlations (Pearson correlation coefficient  
197  $(R^2) > 0.70$ ) and “-” denoting negative correlations  $(R^2 < -0.70)$ . Significance of each response  
198 variable was confirmed with an ANOVA (`anova{stats}`) and only response variables with  
199 significance  $< 0.01$  were kept in the model. The explanatory value of significant response variables  
200 was assessed with variation partitioning analysis using `varpart{vegan}`. All plots were generated  
201 using `ggplot2`<sup>40</sup>.

## 207 **Results and discussion**

### 208 **Extended periods of altered water demand significantly impacted water quality metrics in** 209 **commercial as compared to residential buildings.**

210 Monthly water demand for the commercial building and residential household sites from January  
211 2019 to November 2020 are presented in Figure 1A. At both site types, water demand levels from  
212 January to February of 2020 corresponded to levels that were documented in 2019 (Table S2);  
213 however, starting March 2020, notable different water demand patterns were observed.  
214 Commercial building sites had low water demand levels between March and May 2020 (mean  $\pm$   
215 standard deviation (SD) =  $12,928 \pm 6,183 \text{ m}^3 \cdot \text{month}^{-1}$ ), which were 39% to 46% lower compared  
216 to 2019 ( $22,088 \pm 9,287 \text{ m}^3 \cdot \text{month}^{-1}$ ) due to building closures and individuals transitioning to off-  
217 campus work and remote learning. These observations concur with recent studies that reported  
218 notable reductions in water demand across buildings in commercial, industrial, and institutional  
219 sectors, due to COVID-19 social distancing policies<sup>5,8-10</sup>. In contrast, the residential sites were  
220 associated with water demand increases between March and May 2020, which agrees with recent  
221 studies<sup>6-9</sup>. These ranged between 743 and  $1,987 \text{ m}^3 \cdot \text{month}^{-1}$ , with an average 6% increase in water  
222 demand compared to 2019 ( $1,245 \pm 295 \text{ m}^3 \cdot \text{month}^{-1}$ ; Table S2) and were due to social distancing  
223 policies that prompted “stay at home” orders, which facilitated remoted learning and office  
224 practices, as well as added hygienic actions (e.g., increased hand washing)<sup>1-3</sup>.

225  
226 Low water demand at the commercial building sites impacted water quality due to elevated water  
227 stagnation<sup>22</sup>. Under normal building operations, stagnation-induced effects over multiple time  
228 scales (i.e., overnight, over weekends) have been linked to water quality deterioration that relate  
229 to microbial regrowth<sup>11-14</sup>, opportunistic plumbing pathogen (OPP) growth<sup>12,15-17</sup>, and metal (e.g.,  
230 lead) leaching<sup>18</sup>. In this study, the premise plumbing systems of the commercial building sites had  
231 reduced flow volumes resulting in stagnation for approximately 14 weeks (March 13 – June 4,  
232 2020) and presented evidence of impacted water quality (Table S3A). Total cell concentration  
233 (TCC) measures of the samples that were collected from the commercial building sites during the  
234 first month of phased reopening (i.e., June 2020) averaged at  $2.95 \pm 3.64 \times 10^5 \text{ cells} \cdot \text{ml}^{-1}$  (range =  
235  $1.19 \times 10^4$  to  $1.34 \times 10^6 \text{ cells} \cdot \text{ml}^{-1}$ ) for the entire flushing period and were significantly higher when  
236 compared to the residential household sites (mean  $\pm$  SD =  $1.11 \pm 0.58 \times 10^4 \text{ cells} \cdot \text{ml}^{-1}$ ; Mann-

237 Whitney U test,  $p < 0.05$ ; Table S3A). The first draw sample (TP<sub>1</sub>) collected from both site types  
238 were associated with higher TCC measures than the final flushed samples (TP<sub>7</sub>; Figure 1B).  
239 Specifically, differences in TCC measures of the commercial building TP<sub>1</sub> samples ( $8.07 \pm 3.68 \times$   
240  $10^5$  cells·mL<sup>-1</sup>) were significant and approximately 8-fold higher when compared to the TP<sub>7</sub>  
241 samples ( $1.00 \pm 0.89 \times 10^5$  cells·mL<sup>-1</sup>;  $p < 0.05$ ; Table S3B), while smaller insignificant 2-fold  
242 differences in TCC measures were observed between the TP<sub>1</sub> and TP<sub>7</sub> samples of the residential  
243 household sites ( $2.07 \pm 1.09 \times 10^4$  and  $1.18 \pm 0.12 \times 10^4$  cells·mL<sup>-1</sup>, respectively;  $p > 0.05$ ; Table  
244 S3B). The microbial loads at the commercial building samples were associated with high  
245 temperatures, low total chlorine concentrations, and elevated levels of metals, particularly copper  
246 and manganese that were significantly different when compared to the residential household sites  
247 (all  $p < 0.05$ ; Table S3A). High microbial loads, coinciding with low residual disinfectant  
248 concentrations and elevated temperatures were in consensus with previous studies that were  
249 conducted over shorter time scales (i.e., overnight, over weekends)<sup>11,13-15,41</sup>. These findings  
250 confirm the impact of reduced water demand that led to stagnation and impacted water quality  
251 <sup>21,22,42</sup>.

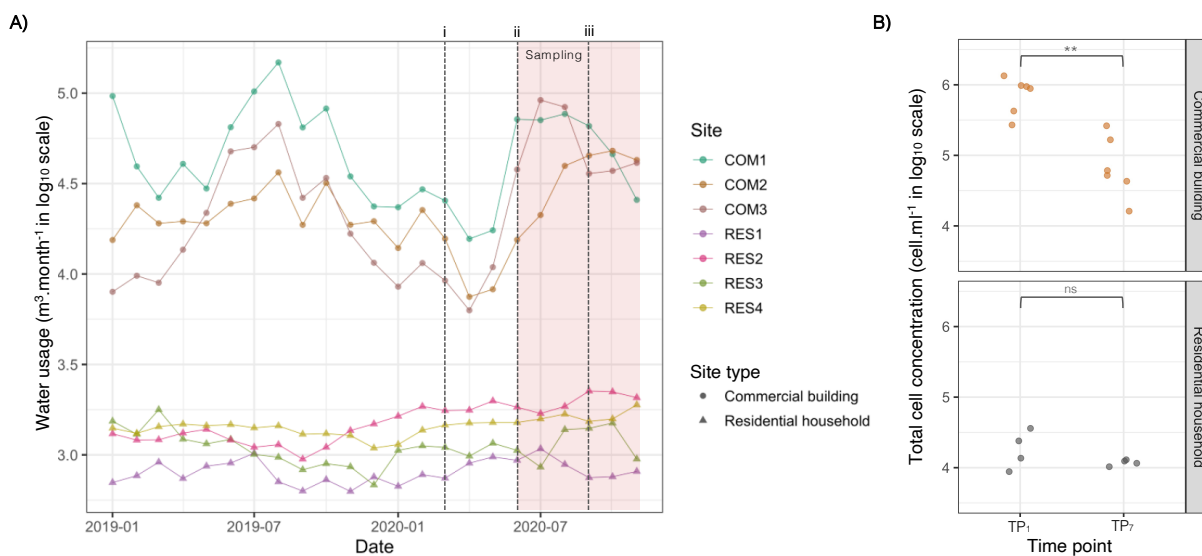

252  
253 **Figure 1 A)** Water demand in cubic meter per month associated with three commercial buildings (COM,  
254 ●) and four residential household (RES, ▲) sites from January 2019 – November 2020. The dashed lines  
255 indicate: i, closure of commercial building sites due to COVID-19 policy interventions; ii, reopening of  
256 commercial building sites for research activity; and iii, reopening of commercial building sites for the Fall  
257 2021 academic year. The red shaded area indicates the sampling period of six months (June to November  
258 2020). **B)** Total cell concentration measured in cells per ml (averaged over triplicate measurements) for



259 first draw (TP<sub>1</sub>) and final flushed (TP<sub>7</sub>) samples that were collected in the commercial building (orange)  
260 and residential household (grey) sites the first month of sampling following phased reopening (i.e., June).  
261 Differences between TP<sub>1</sub> and TP<sub>7</sub> of the commercial building and residential household sites were assessed  
262 using the Mann-Whitney U test and significance are indicated with a significant bar, where  $0.01 \leq p < 0.05$   
263 (\*),  $0.001 \leq p < 0.01$  (\*\*),  $p < 0.001$  (\*\*\*), and not significant (ns).

264  
265 The samples collected from the commercial building sites had greater intact cell proportions,  
266 averaging at  $29.81 \pm 20.24\%$  and were associated with less diverse ( $D_2 = 2126 \pm 350$ ) and even  
267 (evenness =  $0.23 \pm 0.02$ ) microbial communities, compared to the residential household samples  
268 (Figure 2A Panel A) (Mann-Whitney U test, all  $p < 0.05$ ; Table S3A). Differences in intact cell  
269 proportions of the commercial building TP<sub>1</sub> samples ( $52.98 \pm 3.42\%$ ) were significant and  
270 approximately 2-fold higher than the TP<sub>7</sub> samples ( $24.6 \pm 14.22\%$ ) ( $p < 0.05$ ; Table S3B). The TP<sub>1</sub>  
271 samples were also associated with less diverse and even microbial communities, which were  
272 significant when compared to the TP<sub>7</sub> samples (Figure 2A Panel B and C) (independent t-test, all  
273  $p < 0.05$ ; Table S3B). Similar but to a lesser extent insignificant differences in intact cell  
274 proportion,  $D_2$ , and evenness were observed between the TP<sub>1</sub> and TP<sub>7</sub> samples of the residential  
275 household sites (Figure 2A Panel B and C) (Mann-Whitney U test or independent t-test, all  $p >$   
276  $0.05$ ; Table S3B). Further exploration of microbial community composition using structure-based  
277 Bray-Curtis dissimilarity distances showed clear clustering of samples based on site type (Figure  
278 2B), which explained approximately 15% of the variation in the microbial community composition  
279 (PERMANOVA,  $F(1, 208) = 37.00$ ,  $R^2 = 0.151$ ,  $p < 0.05$ ). Localized water chemistry parameters  
280 driving change in the microbial community composition of the commercial building and  
281 residential household sites were identified using Bray-Curtis dbRDA (Figure 2C). Variability in  
282 microbial community composition was significantly explained by site type and six water chemistry  
283 parameters, including temperature, dissolved oxygen [-Pb<sup>208</sup>], total chlorine [-Cu<sup>65</sup>], ammonium,  
284 Mn<sup>55</sup> [+Cu<sup>65</sup>, +Mg<sup>24</sup>], and Zn<sup>66</sup> (permutation test for Bray-Curtis dbRDA, all  $p < 0.01$ ; Table S4A  
285 and S4B). The dbRDA biplot presented in Figure 2C, shows clear separation of samples by site  
286 type that explained approximately 12% of the variation in microbial community composition based  
287 on variance partitioning analysis (adj.  $R^2 = 0.119$ ; Table S4C). Furthermore, total chlorine [-Cu<sup>65</sup>],  
288 ammonium, and dissolved oxygen [-Pb<sup>208</sup>] were identified as primary water chemistry parameters  
289 associated with change in microbial community composition between site types (variance  
290 partitioning analysis, adj.  $R^2 = 0.115$ ,  $0.088$ , and  $0.029$ ; Table S4C). Of these, total chlorine

291 explained most of the variation ~12% and was present at significantly lower concentrations in the  
 292 commercial building samples ( $0.51 \pm 0.68 \text{ mg.l}^{-1}$ ) compared to the residential household samples  
 293 ( $1.57 \pm 0.6 \text{ mg.l}^{-1}$ ; Mann-Whitney U test,  $p < 0.05$ ; Table S3A). Loss of disinfectant residual during  
 294 intermittent periods of stagnation have been shown to drive change in plumbing-associated  
 295 microbial community compositions<sup>14,20,41</sup>. Further, the commercial building sites were associated  
 296 with higher Mn<sup>55</sup>, Mg<sup>24</sup>, Zn<sup>66</sup>, Cu<sup>65</sup> and Pb<sup>208</sup> concentrations, which likely relates to metal leaching  
 297 from the piping materials or from scale formation during stagnation and subsequent release<sup>43</sup>. All  
 298 measured metals concentrations were consistently below the regulatory concentrations.  
 299

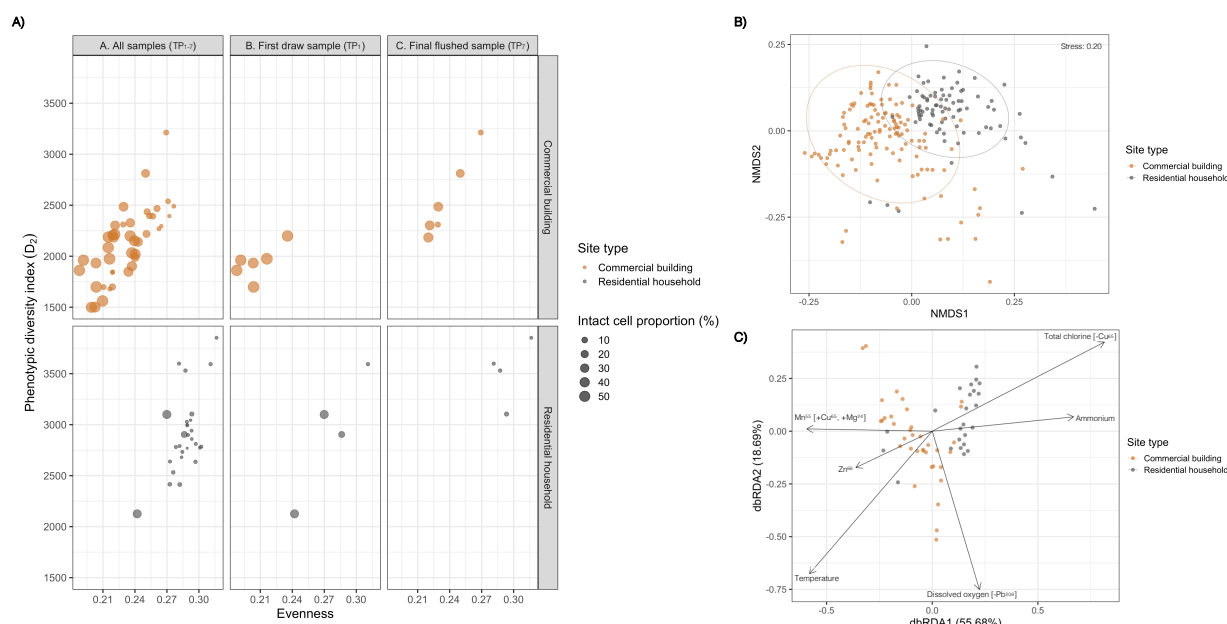

300  
 301 **Figure 2:** **A)** Bubble plot showing the proportion intact cells (depicted by size) with phenotypic diversity  
 302 index (D<sub>2</sub>) and evenness of TP<sub>1-7</sub> samples that were collected the first month of phased reopening from  
 303 commercial building (orange) and residential household (grey) sites. Panels from the left to right represents  
 304 measures related to (i) all samples (TP<sub>1-7</sub>, Panel A), (ii) first draw samples (TP<sub>1</sub>, Panel B), and (iii) final  
 305 flushed samples (TP<sub>7</sub>, Panel C). **B)** NMDS plot illustrating differences in microbial community composition  
 306 between TP<sub>1-7</sub> samples of commercial buildings (orange) and residential households (grey) sites, using  
 307 Bray-Curtis dissimilarity distances on flow cytometric data (i.e., FL-1, FL-3, FCS, and SSC). Ellipse are  
 308 drawn at 95% confident limit. **C)** Bray-Curtis distance-based redundancy analysis (dbRDA) biplot  
 309 illustrating the relationship between site type, water chemistry parameters and microbial community  
 310 composition of TP<sub>1</sub> and TP<sub>7</sub> samples of the commercial building (orange) and residential household (grey)  
 311 sites. Water quality parameters that significantly explained variation in community composition based on



312 permutational ANOVA for Bray-Curtis dbRDA ( $p < 0.01$ ) are shown as black arrows and the percent  
313 variation explained by each axis is shown in parenthesis. Colinear factors are shown in brackets, with “+”  
314 denoting positive correlations (Pearson correlation coefficient ( $R^2$ )  $> 0.70$ ) and “-” denoting negative  
315 correlations ( $R^2 < -0.70$ ).

316

### 317 **Flushing profiles demonstrated differential impact of stagnation in commercial and** 318 **residential buildings varied with phased re-opening.**

319 The first draw samples (TP<sub>1</sub>) that were collected from both site types had higher TCC measures  
320 than the flushed samples (TP<sub>2-7</sub>; Figure 3A). Specifically, TCC measures of the commercial  
321 building TP<sub>1</sub> samples were significantly higher ( $>3$ -fold) when compared to the TP<sub>2-7</sub> samples  
322 (Mann-Whitney U test, all  $p < 0.05$ , Table S5). In contrast, differences in TCC measures between  
323 the TP<sub>1</sub> and TP<sub>2-7</sub> samples of the residential household sites were less than 2-fold and largely  
324 insignificant (Mann-Whitney U test and independent t-test,  $p > 0.05$ ; Table S5). Overall, these  
325 findings suggest that flushing practices counter for stagnation-induced effects at both site types.  
326 Further, flushing practices at the residential household sites more rapidly mitigated stagnation-  
327 induced effects as compared to the commercial building sites. Specifically, TCC measures of the  
328 residential household sites stabilized at concentrations ranging between  $3.82 \times 10^3$  cells.ml<sup>-1</sup> and  
329  $1.99 \times 10^4$  cells.ml<sup>-1</sup>, after flushing approximately  $19.88 \pm 6.12$  L water in 5 min (Figure 3A, Table  
330 S6). Similar trends were observed with temperature measures that stabilized after an initial  
331 decrease between TP<sub>1</sub> and TP<sub>2</sub> (Figure S1). Depending on the sampling month, these temperature  
332 reductions ranged between 1°C and 4°C (Table S6). These congruent patterns imply that fresh  
333 water from the distribution main reached the point of use (PoU) fixtures within the first five  
334 minutes of flushing, and that stagnant water were removed from the plumbing systems of the  
335 residential household sites<sup>13</sup>. In contrast, TCC measures of the commercial building sites presented  
336 little evidence of stabilization and were associated with large differences between TP<sub>1</sub> (TCC  
337 measures averaged across months =  $5.12 \pm 2.22 \times 10^5$  cells.ml<sup>-1</sup>) and TP<sub>2</sub> ( $1.30 \pm 1.49 \times 10^5$   
338 cells.ml<sup>-1</sup>), while successive time points had smaller differences and continually decreased in  
339 sequential order (Figure 3A, Table S6). These changes were linked to elevated temperature  
340 measures that presented little to no evidence of stabilization and ranged between 20.40°C and  
341 24.50°C (Figure S1, Table S6). Overall, these findings imply that fresh water from the distribution  
342 main did not reach the PoU fixtures of the commercial building sites during 30 min of flushing

343 and that stagnation-induced effects in the plumbing systems were persistent. This difference  
344 between commercial buildings and residential households is not surprising and is a direct result of  
345 the size of the plumbing systems at the sampling sites.  
346

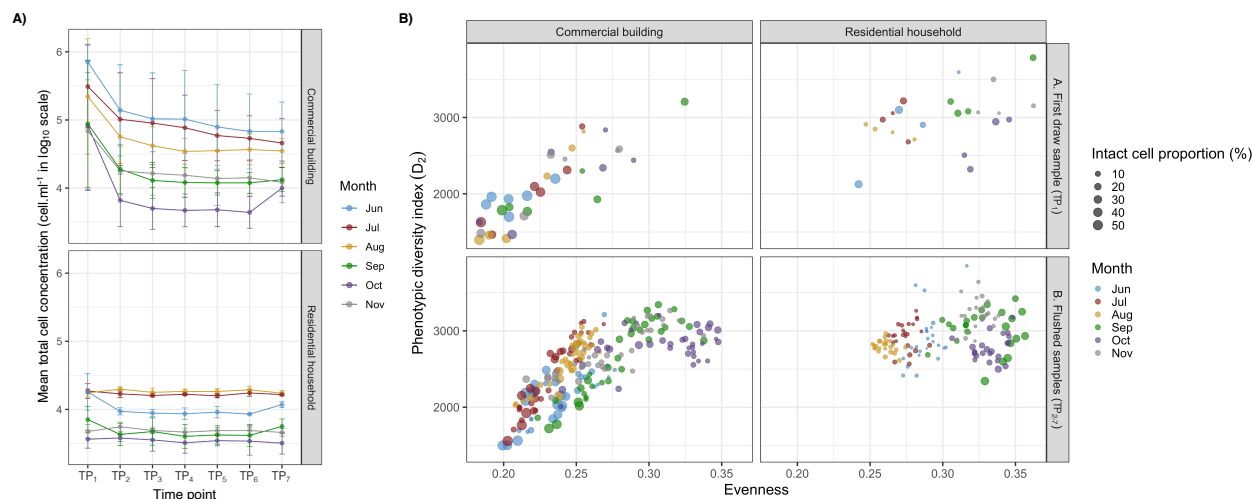

347 **Figure 3: A)** Monthly flush profiles based on total cell concentration (TCC) measurements that were  
348 averaged for individual time points (TP<sub>1</sub>, 0 min; TP<sub>2</sub>, 5 min; TP<sub>3</sub>, 10 min; TP<sub>4</sub>, 15 min; TP<sub>5</sub>, 20 min; TP<sub>6</sub>,  
349 25 min; and TP<sub>7</sub>, 30 min) within each month (Jun, blue; Jul, red; Aug, yellow; Sep, green; Oct, purple; and  
350 Nov, grey) across all commercial building and residential household sites, respectively. Bars represent  
351 standard deviation, indicating the dispersion of individual TCC measures in relation to the mean. B) Bubble  
352 plot showing intact cell proportions (depicted by size) with phenotypic diversity index (D<sub>2</sub>) and evenness  
353 of monthly samples that were collected from the commercial building and residential household sites over  
354 six months. Panels from the top to bottom represents measures related to (i) first draw samples (TP<sub>1</sub>, Panel  
355 A), and (ii) all flushed samples (TP<sub>2-7</sub>, Panel B).  
356

357  
358 The microbial community composition of the TP<sub>1</sub> samples were different from the TP<sub>2-7</sub> samples  
359 and were associated with greater intact cell proportions as well as less diverse and even microbial  
360 communities (Figure 3B). These differences were significant and more noticeable at the  
361 commercial building sites; however, largely insignificant at the residential household sites (Mann-  
362 Whitney U test or independent t-test; Table S5). Structure-based Bray-Curtis dissimilarity  
363 distances indicated significant differences between TP<sub>1</sub> and TP<sub>2-7</sub> samples of the commercial  
364 building sites (PERMANOVA, all  $p < 0.05$ ), with average dissimilarities, depending on the  
365 sampling month, ranging between 33 and 44% (mean  $d_{BC}$  range = 0.327 – 0.437; Table S7). Similar  
366 findings were associated with the residential household sites; however, three months (i.e., August,

367 October, and November) displayed insignificant differences in community composition  
368 (PERMANOVA, all  $p > 0.05$ ; Table S7). For each commercial building and residential household  
369 tap, we also estimated the pairwise  $d_{BC}$  between flushing timepoints for all sampling months per  
370 location and used the slope of the regression fit to estimate the extent of change in community  
371 structure over flushing duration (Table S8, Figure S2 and S3). Results from time-decay  
372 relationships confirm that while flushing impacted the microbial composition of both commercial  
373 buildings and residential households, the impact was more substantial in commercial buildings.  
374 Specifically, flush duration more strongly correlated with microbial community dissimilarity at  
375 the commercial building sites and were associated with steeper slopes that were significant;  
376 however, at the residential household sites, these time-decay relationships were largely  
377 insignificant (Figure 4; Table S8). Interestingly, the linear regression fit slope of the time-decay  
378 relationship at the commercial building sites sequentially decreased in successive months, while  
379 demonstrating no significant trend at the residential household sites; this suggests that with  
380 successive month relaxation of building closures, flushing had a reduced impact on the microbial  
381 community. This is likely due to both reduced periods of stagnation as well as steady decreases in  
382 the impact of initial extended stagnation with phased re-opening, over the course of the sampling  
383 timeframe.

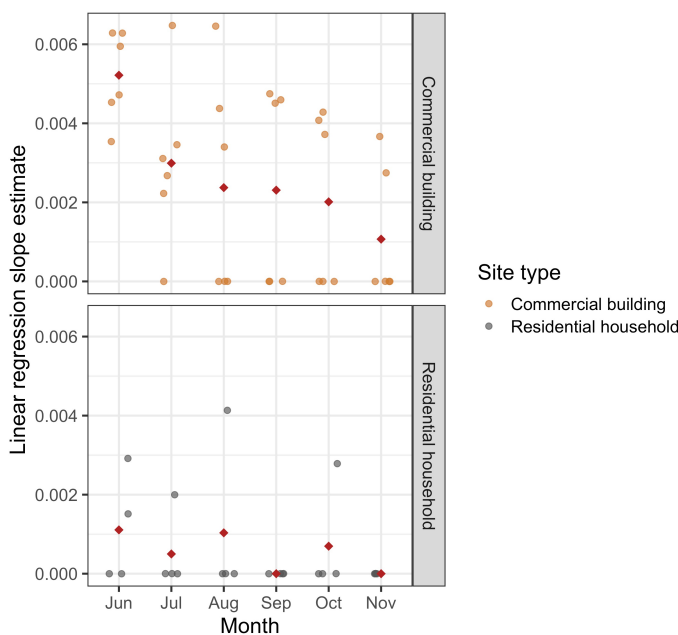

384  
385 **Figure 4:** Linear regression slope estimates as determined from time-decay relationships between Bray-  
386 Curtis dissimilarity distances of any two time point combinations and flush duration between them. The

387 analysis was performed monthly for each commercial building (orange) and residential household (grey)  
388 site, and a slope of 0 was denoted to insignificant Pearson's correlations ( $p < 0.05$ ) (see Figures S2, S3, and  
389 Table S8). The red diamond represents the mean calculated across the linear regression slope estimates.

390

391 **Microbial communities in commercial buildings became more similar to residential**  
392 **buildings after the relaxation of commercial building closures.**

393 Post-first flush samples (TP<sub>2-7</sub>) were used to assess spatial and temporal associations between  
394 microbial communities of the commercial building and residential household sites. NMDS  
395 analyses using Bray-Curtis dissimilarity distances indicated clustering of post-first flush samples  
396 by site type within each month (Figure 5A) with greater support and separation between site types  
397 observed in June, July, August, and September (PERMANOVA,  $R^2 = 0.100 - 0.190$ , all  $p < 0.05$ ;  
398 Table S9), while separation in October and November were significant but had weaker support  
399 (PERMANOVA,  $R^2 = 0.021$  and  $0.061$  for October and November, all  $p < 0.05$ ; Table S9).  
400 Irrespective of the month, the microbial community composition of the commercial building and  
401 residential household sites were distinct (PERMANOVA, all  $p < 0.05$ ), with average  
402 dissimilarities ranging between 35 and 46% (mean  $d_{BC}$  range =  $0.350 - 0.426$ ; Table S9).  
403 Furthermore, the microbial community composition of the commercial building and residential  
404 households sites were less dissimilar in October ( $d_{BC} = 0.384 \pm 0.026$ ) and November ( $d_{BC} = 0.384$   
405  $\pm 0.012$ ) and presented lower variation with near equal dissimilarities in community composition,  
406 compared to the preceding months (Figure 5B, Table S9).

407

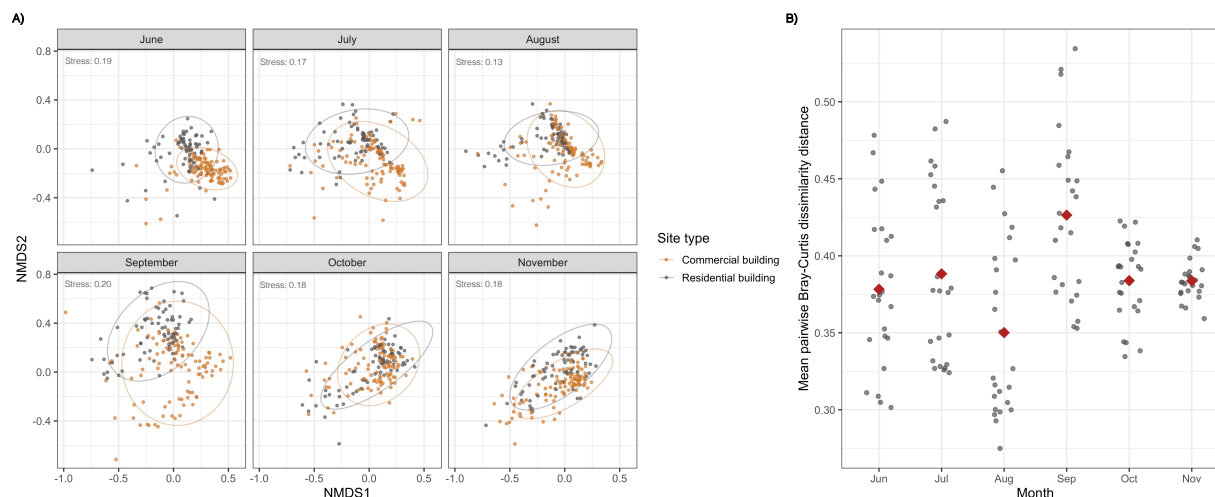

408  
409 **Figure 5:** A) NMDS plot illustrating monthly differences in microbial community composition between  
410 TP<sub>2-7</sub> samples of commercial buildings (orange) and residential households (grey) sites, using Bray-Curtis  
411 dissimilarity distances on flow cytometric data (i.e., FL-1, FL-3, FCS, and SSC). Ellipse are drawn at 95%  
412 confident limit. B) Mean pairwise Bray-Curtis dissimilarity distances between monthly TP<sub>2-7</sub> samples of  
413 commercial building and residential household sites. The red diamond represents the averaged that were  
414 calculated across monthly mean pairwise Bray-Curtis dissimilarity distances.

415  
416 To assess the impact of flow cytometry parameters in Figure 5A, we iteratively performed Bray-  
417 Curtis dissimilarity estimation and NMDS clustering using a range of combination of all four  
418 parameters (FL1, FL3, SSC, and FSC) to recapitulate the site-specific clustering followed by  
419 temporal convergence. As shown in Figure 6A, comparable observations were made when Bray-  
420 Curtis dissimilarity distances on FL1 and FL3 flow cytometric parameters were considered. Again,  
421 samples cluster by site type and presented greater separation the first four months with higher  
422 support (PERMANOVA,  $R^2 = 0.145 - 0.278$ , all  $p < 0.05$ ), when compared to October  
423 (PERMANOVA,  $R^2 = 0.028$ ,  $p < 0.05$ ) and November (PERMANOVA,  $R^2 = 0.095$ ,  $p < 0.05$ ;  
424 Table S10). This suggests that the observed compositional variation between the commercial  
425 building and residential household sites relate to differences in nucleic acid content distributions  
426 of flow cytometric events. Overall, the commercial building sites were associated with  
427 significantly greater HNA cell concentrations, when compared to the residential household sites  
428 (Figure 6B) (independent t-test, all  $p < 0.05$ ; Table S11). These differences were particularly  
429 noticeable in June and July, where the commercial building sites were associated with HNA  
430 concentrations that were 20-fold and 10-fold greater than the residential household sites,

431 respectively (Table S11). Bray-Curtis based dbRDA indicated that variability in microbial  
 432 community composition was significantly explained by month and nine water chemistry  
 433 parameters, including total chlorine, temperature, pH, conductivity, ammonium, nitrite, Fe<sup>54</sup>,  
 434 Mn<sup>55</sup>, and Zn<sup>66</sup> (permutation test for Bray-Curtis dbRDA, all  $p < 0.01$ ; Table S12A). The dbRDA  
 435 plot presented in Figure 6C, showed clustering of samples by month that explained 27% of the  
 436 variation in microbial community composition based on variance partitioning analysis (adj.  $R^2 =$   
 437 0.273; Table S12B). Among the water chemistry parameters, total chlorine, ammonium, and  
 438 conductivity were identify as primary water chemistry parameters driving change in microbial  
 439 community composition between months (variance partitioning analysis, adj.  $R^2 = 0.093, 0.098,$   
 440 and 0.069; Table S12B). Of these, total chlorine and ammonium explained most of the variation  
 441 and were present at lower concentration in June and July (Table S1). Furthermore, these water  
 442 chemistry parameters had significant correlations with HNA concentrations. Specifically, total  
 443 chlorine strongly negatively correlated with HNA concentrations ( $r(34) = -0.77, p < 0.05$ ), while  
 444 ammonium moderately negatively correlated with HNA concentrations ( $r(34) = -0.40, p < 0.05$ ).  
 445 These findings suggesting that temporal changes in residual chlorine and ammonia concentration,  
 446 both impacted by stagnation in a chloraminated system, likely drive change in nucleic acid content  
 447 distributions of the microbial communities in commercial building and residential household sites.  
 448

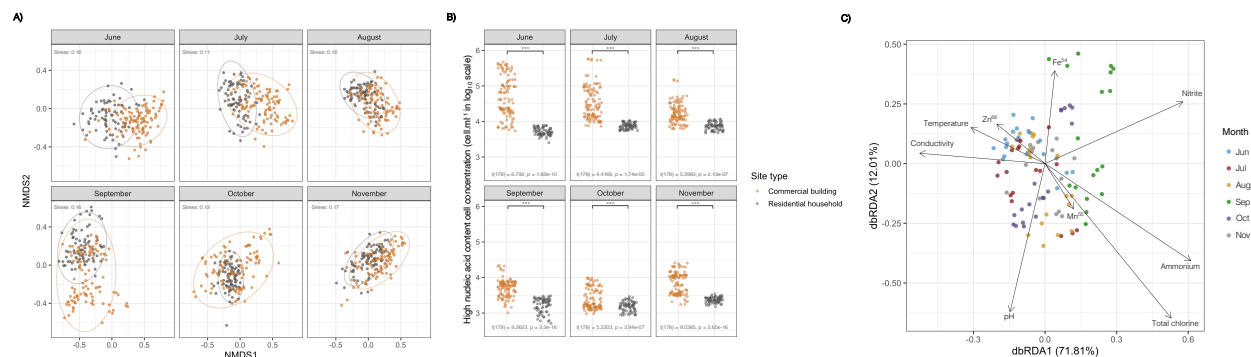

449  
 450 **Figure 6:** A) NMDS plot illustrating differences in microbial community composition between TP<sub>2-7</sub>  
 451 samples of commercial buildings (orange) and residential households (grey) sites, using Bray-Curtis  
 452 dissimilarity distances on flow cytometric data (i.e., FL-1 and FL-3). Ellipse are drawn at 95% confident  
 453 limit. B) High nucleic acid content cell concentration in cells per ml (determined in triplicate) for TP<sub>2-7</sub>  
 454 samples that were collected monthly in the commercial building (orange) and residential household (grey)  
 455 sites. Differences between the commercial building and residential household sites were assessed using  
 456 independent t-test and significance are indicated with a significant bar, with  $0.01 \leq p < 0.05$  (\*),  $0.001 \leq p$

457 < 0.01 (\*\*),  $p < 0.001$  (\*\*\*), and not significant (ns). C) Bray-Curtis distance-based redundancy analysis  
458 (dbRDA) biplot illustrating the relationship between sampling month, water chemistry parameters and  
459 microbial community composition of TP<sub>7</sub> samples of the commercial building and residential household  
460 sites, respectively. Water quality parameters that significantly explained variation in community  
461 composition based on permutational ANOVA for Bray-Curtis dbRDA ( $p < 0.01$ ) are shown as black arrows  
462 and the percent variation explained by each axis is shown in parenthesis.

463 Thus, our study demonstrates that COVID-19 related building closures in March 2020 not only  
464 impacted water demand but also microbial community composition in commercial building sites  
465 as compared to residential household sites. While this impact on the drinking water microbial  
466 community of commercial building sites could not be mitigated through short-term flushing  
467 regimes (30 minutes) following phased reopening, the microbial community demonstrated gradual  
468 recovery over a period of months as indicated by their convergence towards the microbial  
469 communities at the residential household sites. This suggests that sustained and gradual increase  
470 in water demand may play a more important role in the recovery of building plumbing-associated  
471 microbial communities as compared to short-term flushing after extended periods of altered water  
472 demand that result in reduced flow volumes.

473

#### 474 **Funding**

475 This research was supported by NSF CBET 2029850 and NSF CBET 1743950.

476

#### 477 **Reference**

- 478 (1) McGrail, D. J.; Dai, J.; McAndrews, K. M.; Kalluri, R. Enacting National Social Distancing  
479 Policies Corresponds with Dramatic Reduction in COVID19 Infection Rates. *PLOS ONE*  
480 **2020**, *15* (7), e0236619. <https://doi.org/10.1371/journal.pone.0236619>.
- 481 (2) Tian, H.; Liu, Y.; Li, Y.; Wu, C.-H.; Chen, B.; Kraemer, M. U.; Li, B.; Cai, J.; Xu, B.;  
482 Yang, Q.; Wang, B.; Yang, P.; Cui, Y.; Song, Y.; Zheng, P.; Wang, Q.; Bjornstad, O. N.;  
483 Yang, R.; Grenfell, B. T.; Pybus, O. G.; Dye, C. *An Investigation of Transmission Control*  
484 *Measures during the First 50 Days of the COVID-19 Epidemic in China*.
- 485 (3) Kramer, A.; Kramer, K. Z. The Potential Impact of the Covid-19 Pandemic on Occupational  
486 Status, Work from Home, and Occupational Mobility. *Journal of Vocational Behavior*  
487 **2020**, *119*, 103442. <https://doi.org/10.1016/j.jvb.2020.103442>.



- 488 (4) Spearing, L. A.; Thelemaque, N.; Kaminsky, J. A.; Katz, L. E.; Kinney, K. A.; Kirisits, M.  
489 J.; Sela, L.; Faust, K. M. Implications of Social Distancing Policies on Drinking Water  
490 Infrastructure: An Overview of the Challenges to and Responses of U.S. Utilities during the  
491 COVID-19 Pandemic. *ACS ES&T Water* **2021**, *1* (4), 888–899.  
492 <https://doi.org/10.1021/acsestwater.0c00229>.
- 493 (5) Spearing, L. A.; Tiedmann, H. R.; Sela, L.; Nagy, Z.; Kaminsky, J. A.; Katz, L. E.; Kinney,  
494 K. A.; Kirisits, M. J.; Faust, K. M. Human–Infrastructure Interactions during the COVID-  
495 19 Pandemic: Understanding Water and Electricity Demand Profiles at the Building Level.  
496 *ACS ES&T Water* **2021**, *1* (11), 2327–2338. <https://doi.org/10.1021/acsestwater.1c00176>.
- 497 (6) Abu-Bakar, H.; Williams, L.; Hallett, S. H. Quantifying the Impact of the COVID-19  
498 Lockdown on Household Water Consumption Patterns in England. *npj Clean Water* **2021**,  
499 *4* (1), 13. <https://doi.org/10.1038/s41545-021-00103-8>.
- 500 (7) Lüdtke, D. U.; Luetkemeier, R.; Schneemann, M.; Liehr, S. Increase in Daily Household  
501 Water Demand during the First Wave of the Covid-19 Pandemic in Germany. *Water* **2021**,  
502 *13* (3), 260. <https://doi.org/10.3390/w13030260>.
- 503 (8) Li, D.; Engel, R. A.; Ma, X.; Porse, E.; Kaplan, J. D.; Margulis, S. A.; Lettenmaier, D. P.  
504 Stay-at-Home Orders during the COVID-19 Pandemic Reduced Urban Water Use.  
505 *Environmental Science & Technology Letters* **2021**, *8* (5), 431–436.  
506 <https://doi.org/10.1021/acs.estlett.0c00979>.
- 507 (9) Kalbusch, A.; Henning, E.; Brikalski, M. P.; Luca, F. V. de; Konrath, A. C. Impact of  
508 Coronavirus (COVID-19) Spread-Prevention Actions on Urban Water Consumption.  
509 *Resources, Conservation and Recycling* **2020**, *163*, 105098.  
510 <https://doi.org/10.1016/j.resconrec.2020.105098>.
- 511 (10) Balacco, G.; Totaro, V.; Iacobellis, V.; Manni, A.; Spagnoletta, M.; Piccinni, A. F. Influence  
512 of COVID-19 Spread on Water Drinking Demand: The Case of Puglia Region (Southern  
513 Italy). *Sustainability* **2020**, *12* (15), 5919. <https://doi.org/10.3390/su12155919>.
- 514 (11) Lipphaus, P.; Hammes, F.; Kötzsch, S.; Green, J.; Gillespie, S.; Nocker, A. Microbiological  
515 Tap Water Profile of a Medium-Sized Building and Effect of Water Stagnation.  
516 *Environmental Technology* **2014**, *35* (5), 620–628.  
517 <https://doi.org/10.1080/09593330.2013.839748>.



- 518 (12) Ley, C. J.; Proctor, C. R.; Singh, G.; Ra, K.; Noh, Y.; Odimayomi, T.; Salehi, M.; Julien,  
519 R.; Mitchell, J.; Nejadhashemi, A. P.; Whelton, A. J.; Aw, T. G. Drinking Water  
520 Microbiology in a Water-Efficient Building: Stagnation, Seasonality, and Physicochemical  
521 Effects on Opportunistic Pathogen and Total Bacteria Proliferation. *Environmental Science:  
522 Water Research & Technology* **2020**, *6* (10), 2902–2913.  
523 <https://doi.org/10.1039/D0EW00334D>.
- 524 (13) Lautenschlager, K.; Boon, N.; Wang, Y.; Egli, T.; Hammes, F. Overnight Stagnation of  
525 Drinking Water in Household Taps Induces Microbial Growth and Changes in Community  
526 Composition. *Water Research* **2010**, *44* (17), 4868–4877.  
527 <https://doi.org/10.1016/j.watres.2010.07.032>.
- 528 (14) Ling, F.; Whitaker, R.; LeChevallier, M. W.; Liu, W.-T. Drinking Water Microbiome  
529 Assembly Induced by Water Stagnation. *The ISME Journal* **2018**, *12* (6), 1520–1531.  
530 <https://doi.org/10.1038/s41396-018-0101-5>.
- 531 (15) Huang, C. K.; Weerasekara, A.; Bond, P. L.; Weynberg, K. D.; Guo, J. Characterizing the  
532 Premise Plumbing Microbiome in Both Water and Biofilms of a 50-Year-Old Building.  
533 *Science of The Total Environment* **2021**, *798*, 149225.  
534 <https://doi.org/10.1016/j.scitotenv.2021.149225>.
- 535 (16) Hozalski, R. M.; LaPara, T. M.; Zhao, X.; Kim, T.; Waak, M. B.; Burch, T.; McCarty, M.  
536 Flushing of Stagnant Premise Water Systems after the COVID-19 Shutdown Can Reduce  
537 Infection Risk by *Legionella* and *Mycobacterium* Spp. *Environmental Science &  
538 Technology* **2020**, *54* (24), 15914–15924. <https://doi.org/10.1021/acs.est.0c06357>.
- 539 (17) Bédard, E.; Laferrière, C.; Déziel, E.; Prévost, M. Impact of Stagnation and Sampling  
540 Volume on Water Microbial Quality Monitoring in Large Buildings. *PLOS ONE* **2018**, *13*  
541 (6), e0199429. <https://doi.org/10.1371/journal.pone.0199429>.
- 542 (18) Zietz, B. P.; Laß, J.; Suchenwirth, R. Assessment and Management of Tap Water Lead  
543 Contamination in Lower Saxony, Germany. *International Journal of Environmental Health  
544 Research* **2007**, *17* (6), 407–418. <https://doi.org/10.1080/09603120701628719>.
- 545 (19) Chowdhury, S.; Rodriguez, M. J.; Sadiq, R.; Serodes, J. Modeling DBPs Formation in  
546 Drinking Water in Residential Plumbing Pipes and Hot Water Tanks. *Water Research* **2011**,  
547 *45* (1), 337–347. <https://doi.org/10.1016/j.watres.2010.08.002>.

- 548 (20) Ji, P.; Parks, J.; Edwards, M. A.; Pruden, A. Impact of Water Chemistry, Pipe Material and  
549 Stagnation on the Building Plumbing Microbiome. *PLOS ONE* **2015**, *10* (10), e0141087.  
550 <https://doi.org/10.1371/journal.pone.0141087>.
- 551 (21) Singh, R.; Hamilton, K. A.; Rasheduzzaman, M.; Yang, Z.; Kar, S.; Fasnacht, A.; Masters,  
552 S. v.; Gurian, P. L. Managing Water Quality in Premise Plumbing: Subject Matter Experts'  
553 Perspectives and a Systematic Review of Guidance Documents. *Water* **2020**, *12* (2), 347.  
554 <https://doi.org/10.3390/w12020347>.
- 555 (22) Proctor, C. R.; Rhoads, W. J.; Keane, T.; Salehi, M.; Hamilton, K.; Pieper, K. J.; Cwiertny,  
556 D. M.; Prévost, M.; Whelton, A. J. Considerations for Large Building Water Quality after  
557 Extended Stagnation. *AWWA Water Science* **2020**, *2* (4).  
558 <https://doi.org/10.1002/aws2.1186>.
- 559 (23) Prest, E. I.; Hammes, F.; Kötzsch, S.; van Loosdrecht, M. C. M.; Vrouwenvelder, J. S.  
560 Monitoring Microbiological Changes in Drinking Water Systems Using a Fast and  
561 Reproducible Flow Cytometric Method. *Water Research* **2013**, *47* (19), 7131–7142.  
562 <https://doi.org/10.1016/j.watres.2013.07.051>.
- 563 (24) Props, R.; Monsieurs, P.; Mysara, M.; Clement, L.; Boon, N. Measuring the Biodiversity of  
564 Microbial Communities by Flow Cytometry. *Methods in Ecology and Evolution* **2016**, *7*  
565 (11), 1376–1385. <https://doi.org/10.1111/2041-210X.12607>.
- 566 (25) van Nevel, S.; Koetzsch, S.; Proctor, C. R.; Besmer, M. D.; Prest, E. I.; Vrouwenvelder, J.  
567 S.; Knezev, A.; Boon, N.; Hammes, F. Flow Cytometric Bacterial Cell Counts Challenge  
568 Conventional Heterotrophic Plate Counts for Routine Microbiological Drinking Water  
569 Monitoring. *Water Research* **2017**, *113*, 191–206.  
570 <https://doi.org/10.1016/j.watres.2017.01.065>.
- 571 (26) Favere, J.; Buyschaert, B.; Boon, N.; de Gussemé, B. Online Microbial Fingerprinting for  
572 Quality Management of Drinking Water: Full-Scale Event Detection. *Water Research* **2020**,  
573 *170*, 115353. <https://doi.org/10.1016/j.watres.2019.115353>.
- 574 (27) Gabrielli, M.; Turolla, A.; Antonelli, M. Bacterial Dynamics in Drinking Water Distribution  
575 Systems and Flow Cytometry Monitoring Scheme Optimization. *Journal of Environmental*  
576 *Management* **2021**, *286*, 112151. <https://doi.org/10.1016/j.jenvman.2021.112151>.

- 577 (28) van Nevel, S.; Buyschaert, B.; de Roy, K.; de Gussem, B.; Clement, L.; Boon, N. Flow  
578 Cytometry for Immediate Follow-up of Drinking Water Networks after Maintenance. *Water*  
579 *Research* **2017**, *111*, 66–73. <https://doi.org/10.1016/j.watres.2016.12.040>.
- 580 (29) American Public Health Association; American Water Works Association; Water  
581 Environment Federation. *Standard Methods for Examination of Water and Wastewater*,  
582 20th ed.; Washington, D.C, 1998.
- 583 (30) Stubbins, A.; Dittmar, T. Low Volume Quantification of Dissolved Organic Carbon and  
584 Dissolved Nitrogen. *Limnology and Oceanography: Methods* **2012**, *10* (5), 347–352.  
585 <https://doi.org/10.4319/lom.2012.10.347>.
- 586 (31) Hammes, F.; Berney, M.; Wang, Y.; Vital, M.; Köster, O.; Egli, T. Flow-Cytometric Total  
587 Bacterial Cell Counts as a Descriptive Microbiological Parameter for Drinking Water  
588 Treatment Processes. *Water Research* **2008**, *42* (1–2), 269–277.  
589 <https://doi.org/10.1016/j.watres.2007.07.009>.
- 590 (32) Nescerecka, A.; Hammes, F.; Juhna, T. A Pipeline for Developing and Testing Staining  
591 Protocols for Flow Cytometry, Demonstrated with SYBR Green I and Propidium Iodide  
592 Viability Staining. *Journal of Microbiological Methods* **2016**, *131*, 172–180.  
593 <https://doi.org/10.1016/j.mimet.2016.10.022>.
- 594 (33) Berney, M.; Vital, M.; Hülshoff, I.; Weilenmann, H.-U.; Egli, T.; Hammes, F. Rapid,  
595 Cultivation-Independent Assessment of Microbial Viability in Drinking Water. *Water*  
596 *Research* **2008**, *42* (14), 4010–4018. <https://doi.org/10.1016/j.watres.2008.07.017>.
- 597 (34) R Core Team. R: A Language and Environment for Statistical Computing. R Foundation  
598 for Statistical Computing. Vienna, Austria 2013.
- 599 (35) Ellis, B.; Haaland, P.; le Meur, N.; Gopalakrishnan, N.; Spidlen, J.; Jiang, M.; Finak, G.  
600 FlowCore: FlowCore: Basic Structures for Flow Cytometry Data. 2019.
- 601 (36) Hammes, F.; Egli, T. Cytometric Methods for Measuring Bacteria in Water: Advantages,  
602 Pitfalls and Applications. *Analytical and Bioanalytical Chemistry* **2010**, *397* (3), 1083–  
603 1095. <https://doi.org/10.1007/s00216-010-3646-3>.
- 604 (37) Hammes, F. A.; Egli, T. New Method for Assimilable Organic Carbon Determination Using  
605 Flow-Cytometric Enumeration and a Natural Microbial Consortium as Inoculum.  
606 *Environmental Science & Technology* **2005**, *39* (9), 3289–3294.  
607 <https://doi.org/10.1021/es048277c>.

- 608 (38) Oksanen, J.; Blanchet, F. G.; Friendly, M.; Kindt, R.; Legendre, P.; McGlinn, D.; Minchin,  
609 P. R.; O'Hara, R. B.; Simpson, G. L.; Solymos, P.; Henry, M.; Stevens, H.; Szoecs, E.;  
610 Wagner, H. *Vegan: Community Ecology Package Version 2.5-6*. **2019**.
- 611 (39) Dormann, C. F.; Elith, J.; Bacher, S.; Buchmann, C.; Carl, G.; Carré, G.; Marquéz, J. R. G.;  
612 Gruber, B.; Lafourcade, B.; Leitão, P. J.; Münkemüller, T.; McClean, C.; Osborne, P. E.;  
613 Reineking, B.; Schröder, B.; Skidmore, A. K.; Zurell, D.; Lautenbach, S. Collinearity: A  
614 Review of Methods to Deal with It and a Simulation Study Evaluating Their Performance.  
615 *Ecography* **2013**, *36* (1), 27–46. <https://doi.org/10.1111/j.1600-0587.2012.07348.x>.
- 616 (40) Wickham, H. *Ggplot2: Elegant Graphics for Data Analysis*; Springer-Verlag: New York,  
617 NY, 2016.
- 618 (41) Zhang, H.; Xu, L.; Huang, T.; Yan, M.; Liu, K.; Miao, Y.; He, H.; Li, S.; Sekar, R.  
619 Combined Effects of Seasonality and Stagnation on Tap Water Quality: Changes in  
620 Chemical Parameters, Metabolic Activity and Co-Existence in Bacterial Community.  
621 *Journal of Hazardous Materials* **2021**, *403*, 124018.  
622 <https://doi.org/10.1016/j.jhazmat.2020.124018>.
- 623 (42) Julien, R.; Dreelin, E.; Whelton, A. J.; Lee, J.; Aw, T. G.; Dean, K.; Mitchell, J. Knowledge  
624 Gaps and Risks Associated with Premise Plumbing Drinking Water Quality. *AWWA Water*  
625 *Science* **2020**, *2* (3). <https://doi.org/10.1002/aws2.1177>.
- 626 (43) Gonzalez, S.; Lopez-Roldan, R.; Cortina, J. L. Presence of Metals in Drinking Water  
627 Distribution Networks Due to Pipe Material Leaching: A Review. *Toxicological and*  
628 *Environmental Chemistry*. July 2013, pp 870–889.  
629 <https://doi.org/10.1080/02772248.2013.840372>.
- 630

A)

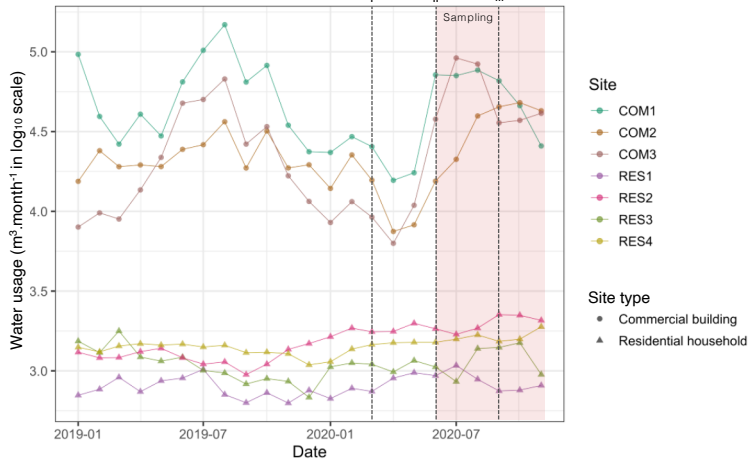

B)

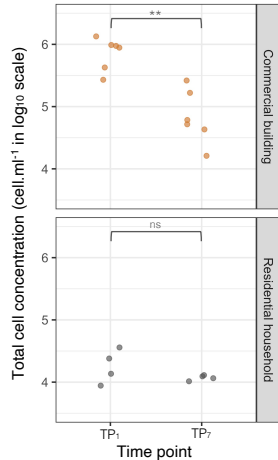

A)

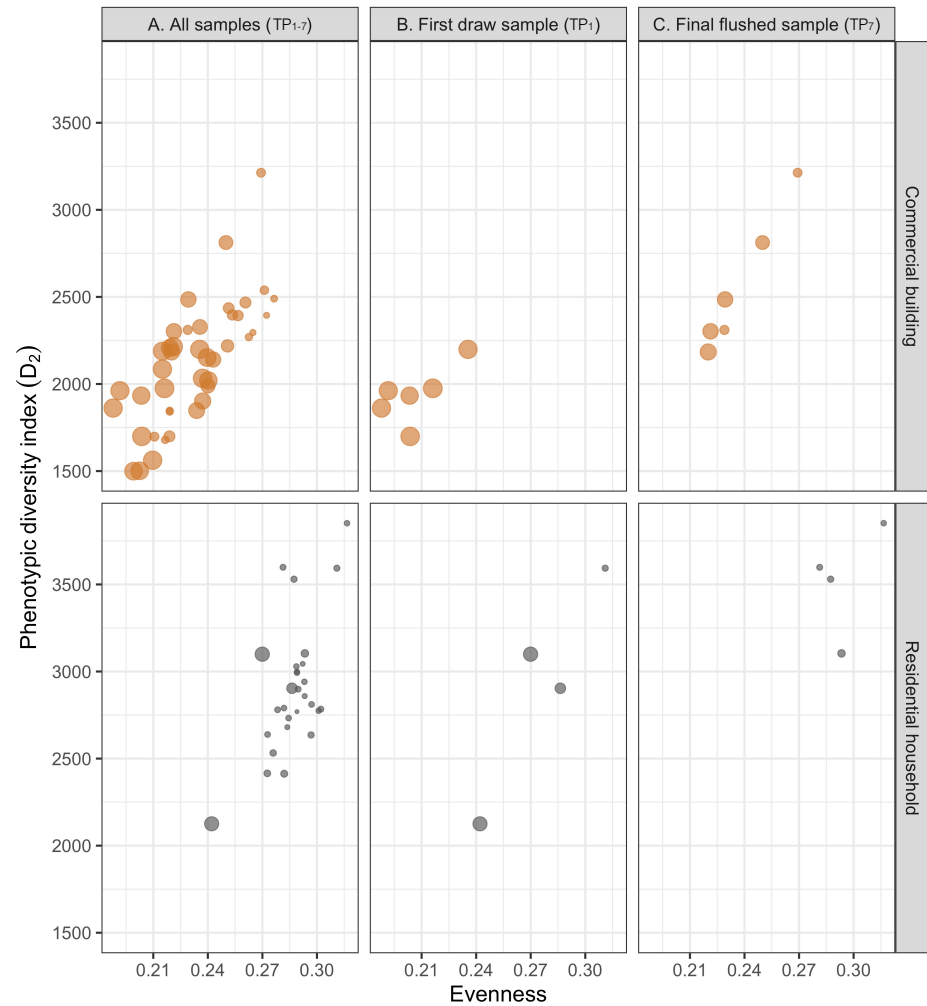

B)

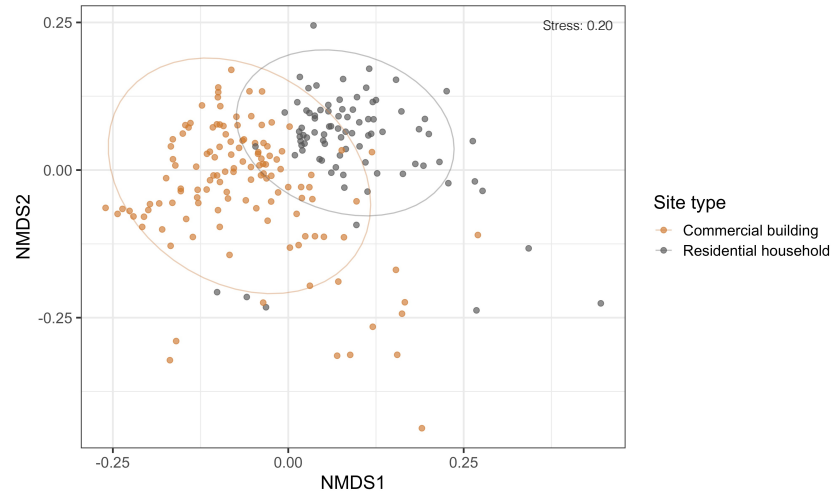

C)

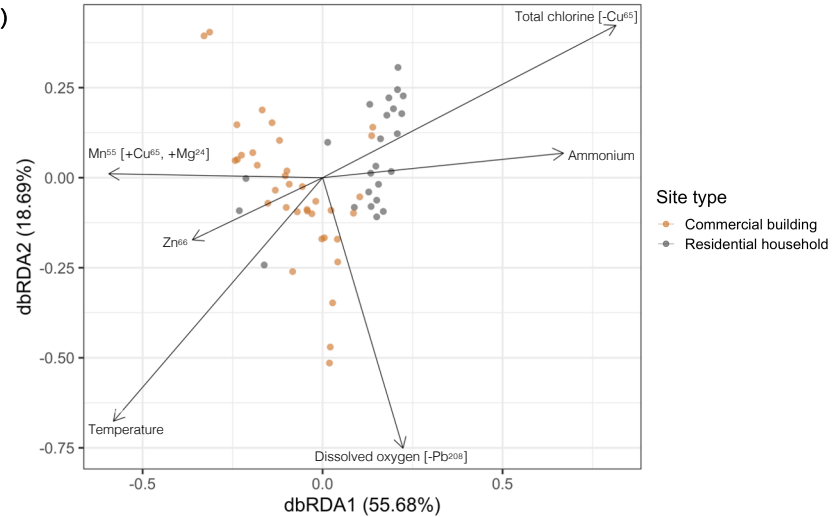

A)

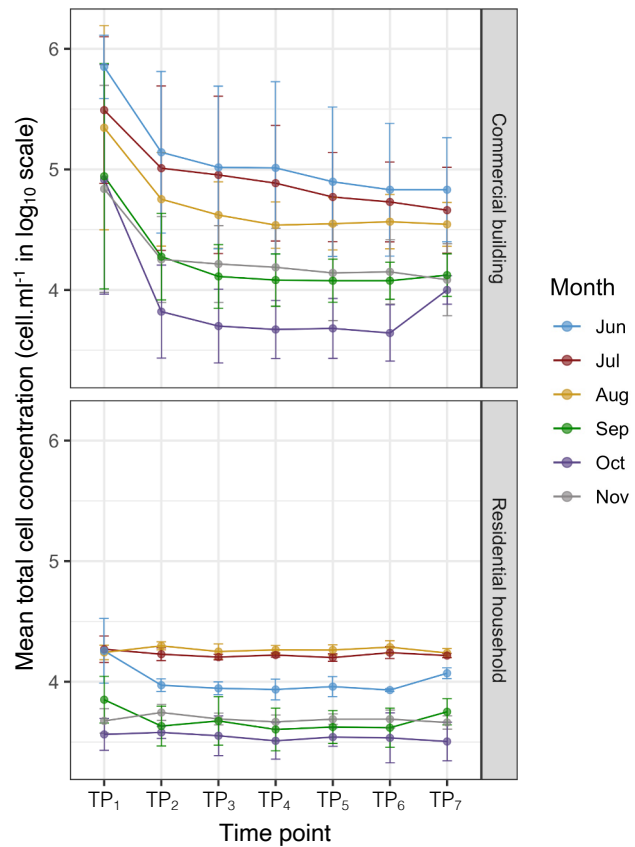

B)

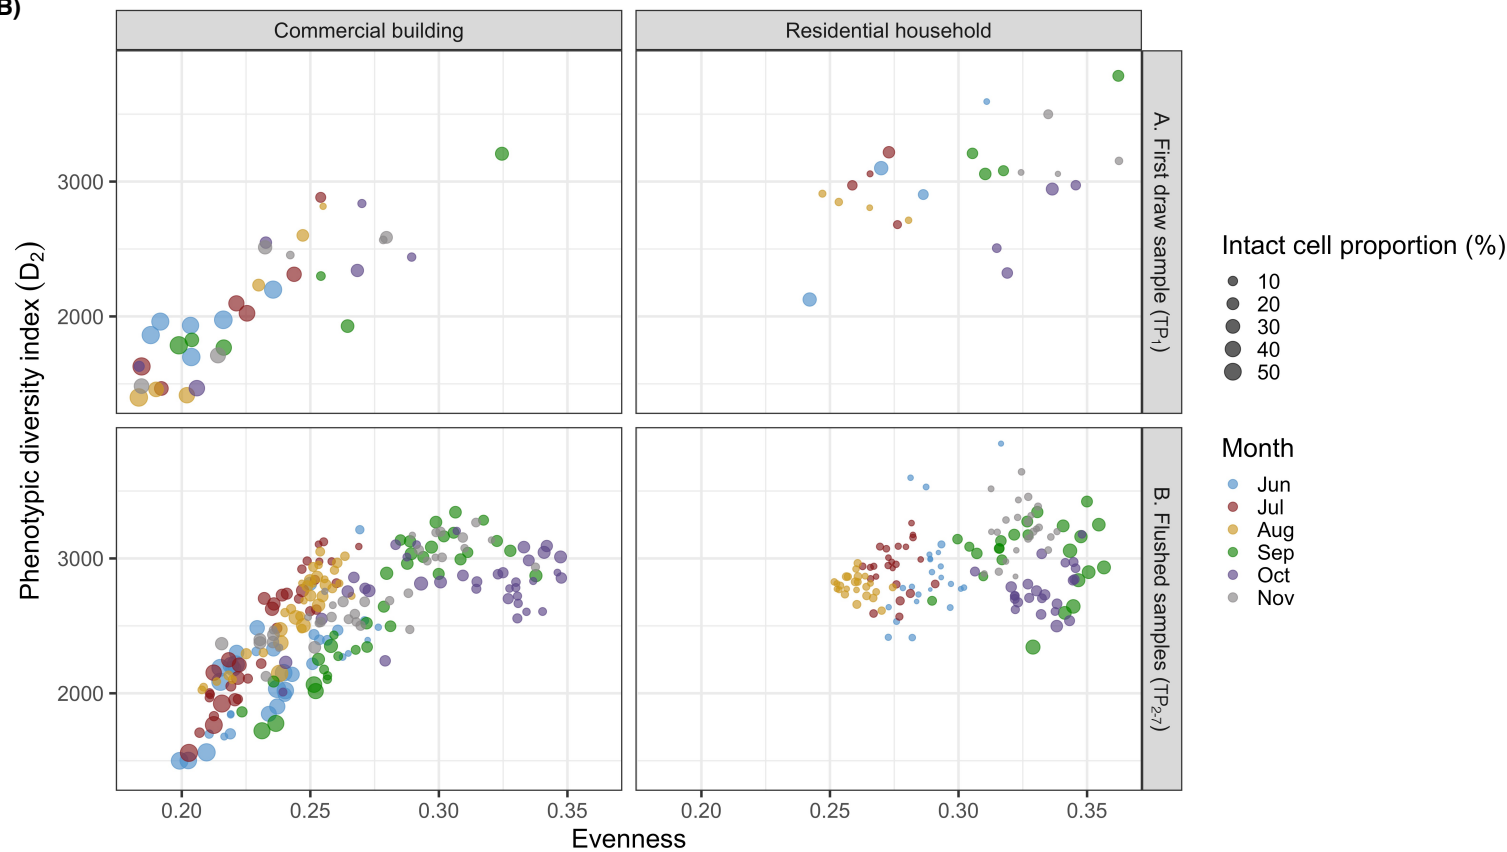

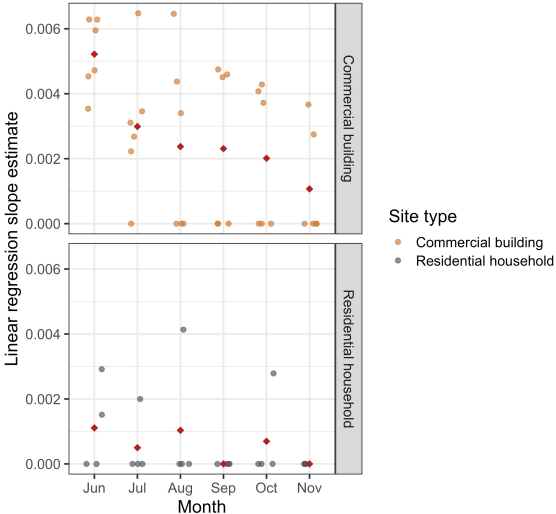



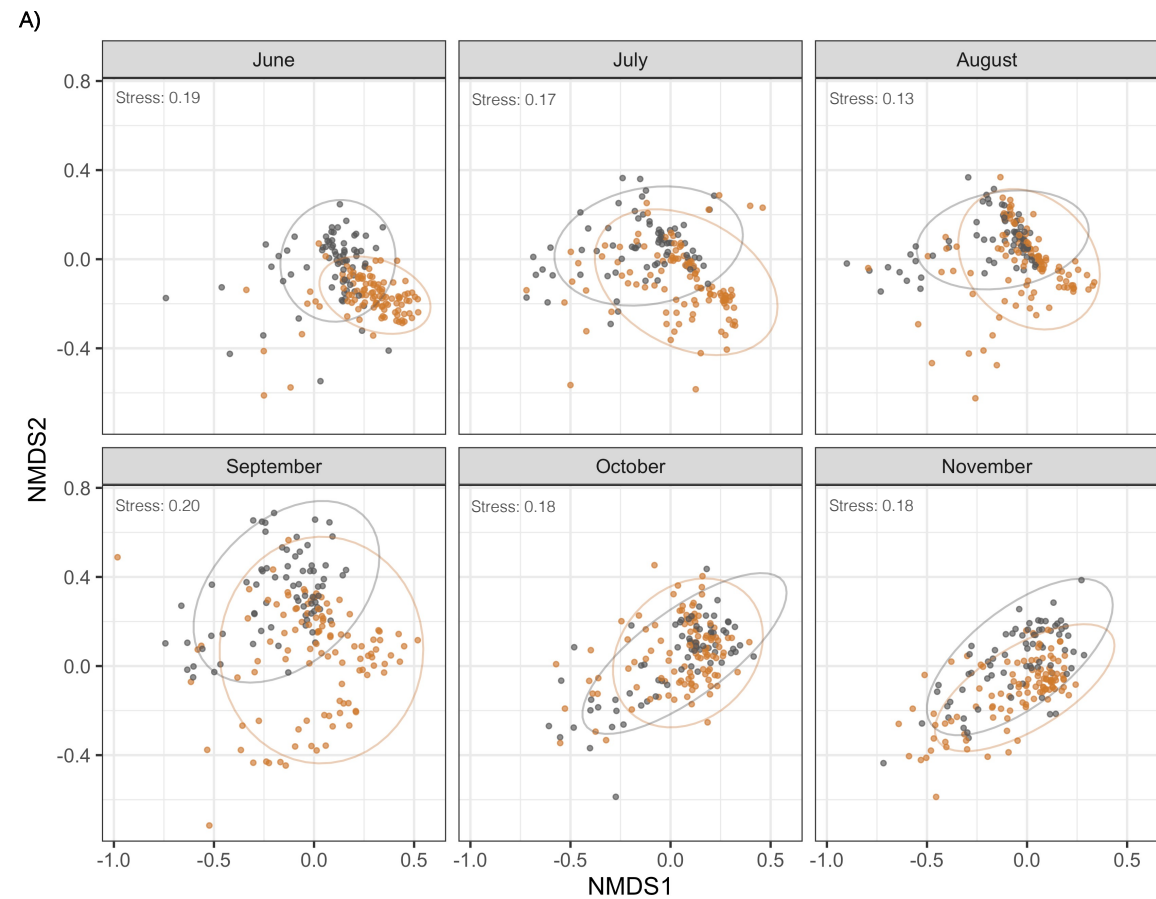

Site type

- Commercial building
- Residential building

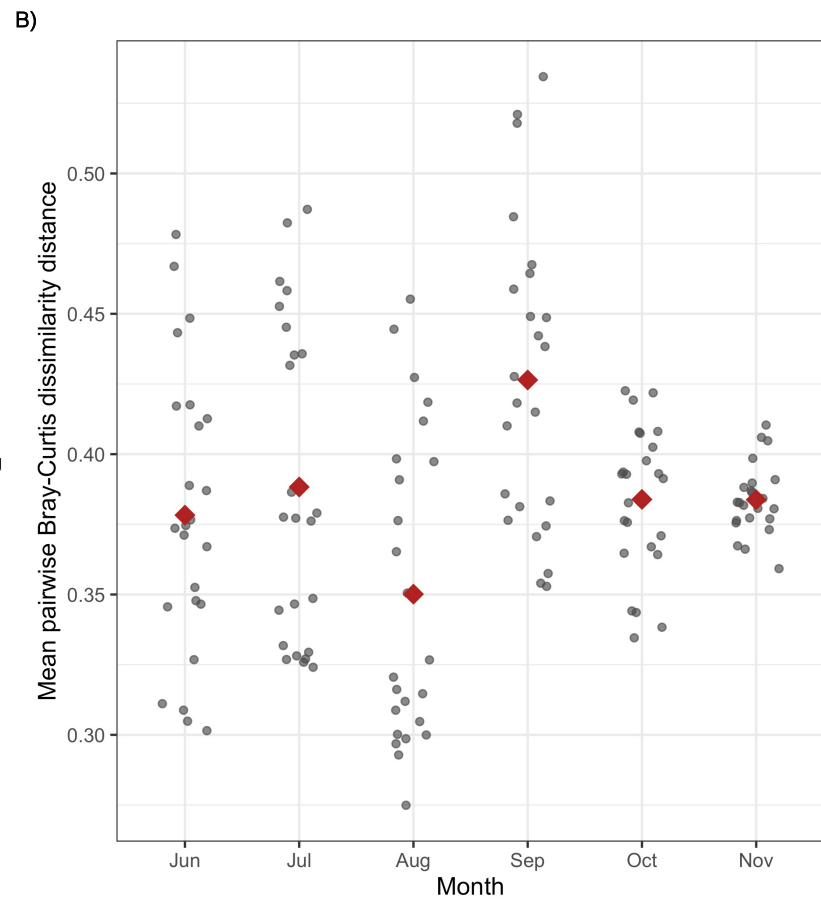

A)

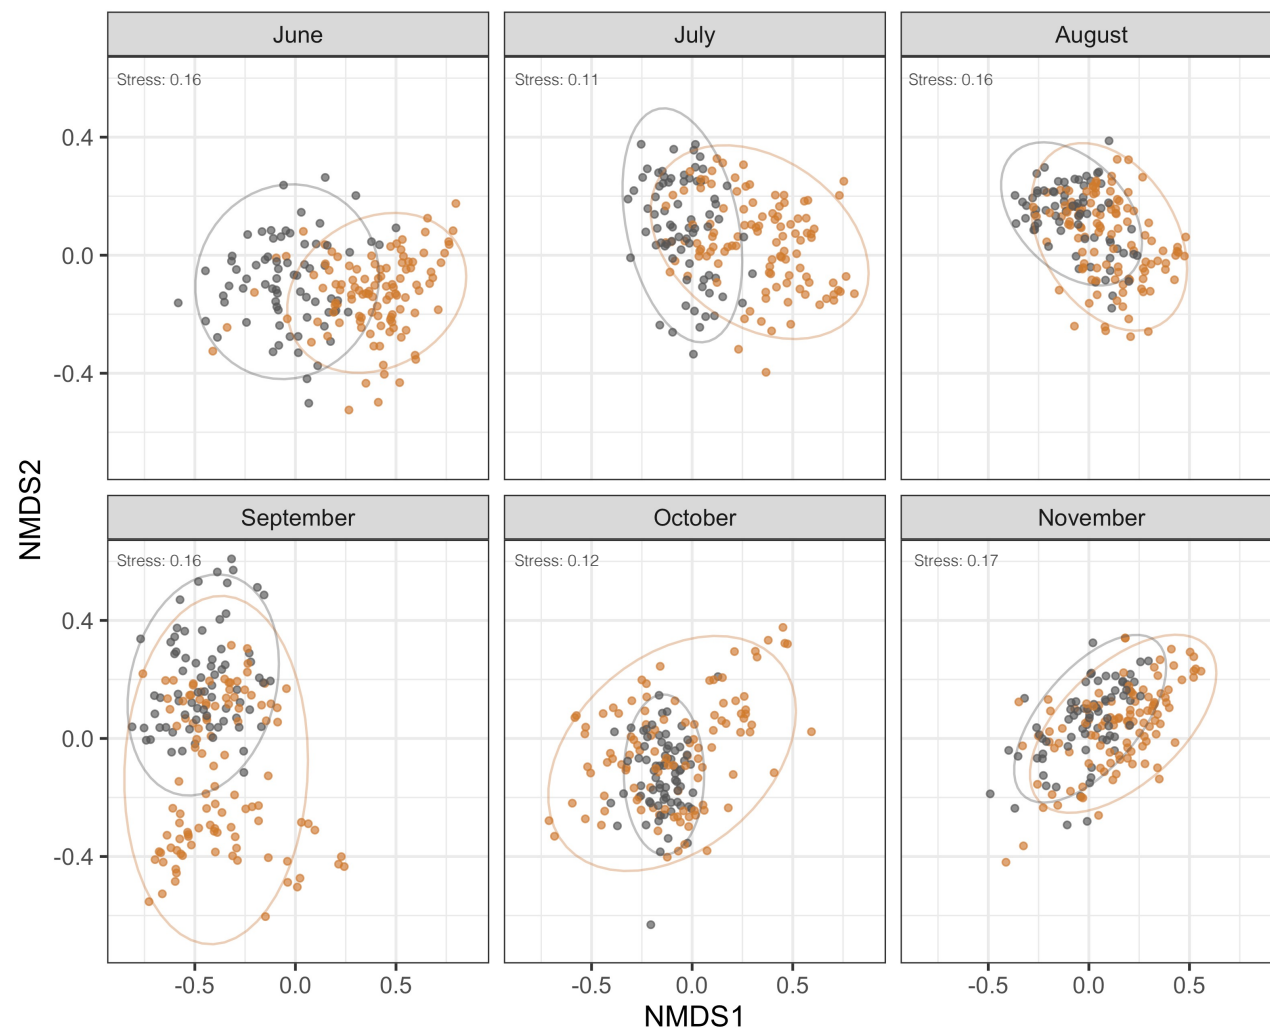

B)

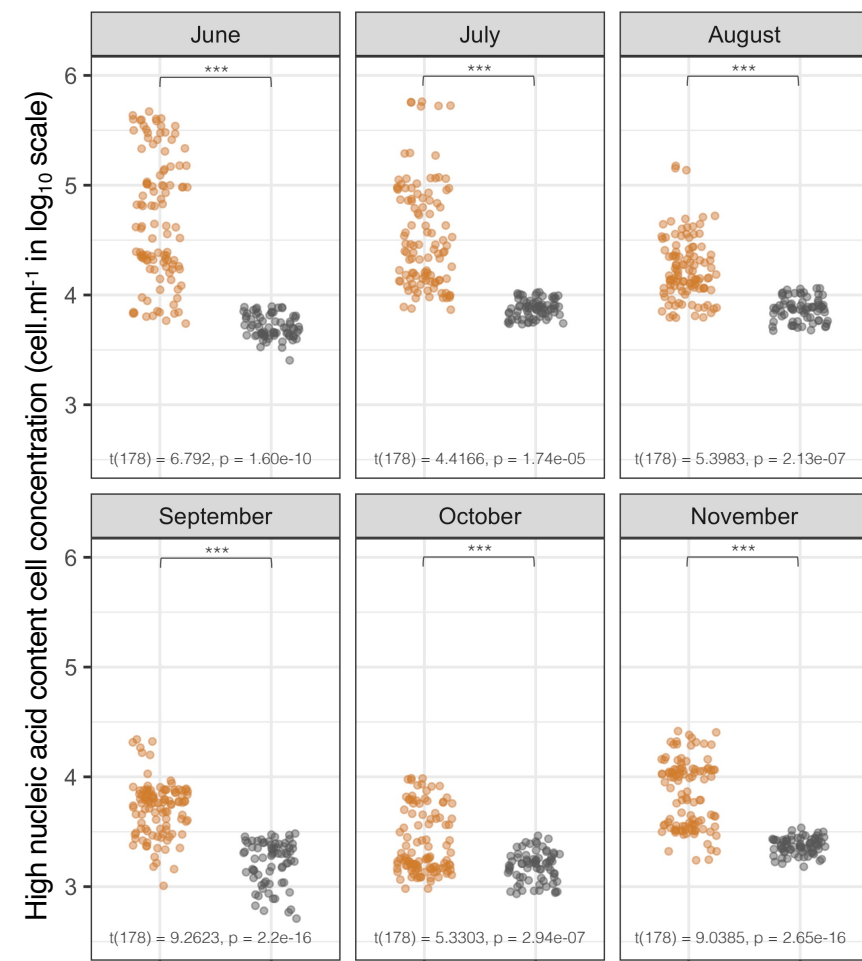

C)

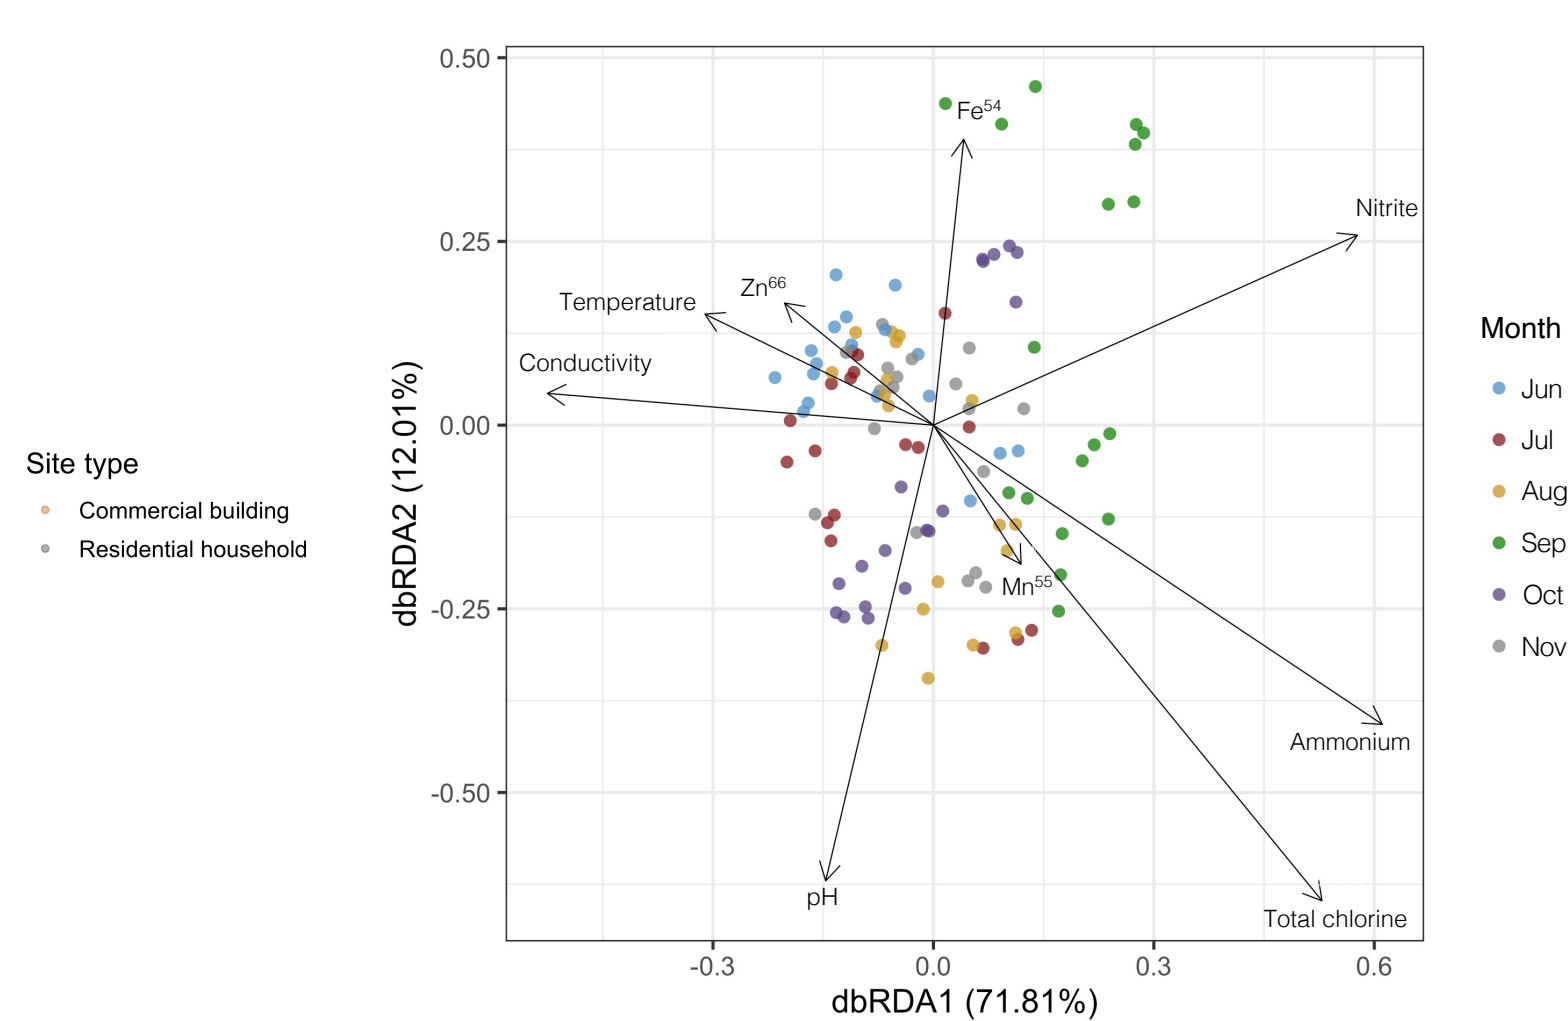

Source: https://medrxiv.org/content/10.1101/2022.01.17.22269440v1.full.pdf
